# Supplementary material
Source: PubMed Central journal article supplement (PMC3058998)

## Supplementary Figure Legend

**Supplementary Fig 1.** Various dose of *apoa2* MO1 and MO2 inhibited the expression of zebrafish *apoa2*-green fluorescent protein (GFP) fused protein in zebrafish embryos at 60%-epiboly stage.

**Supplementary Fig 2. Knocking down *apoa2* leads to defective cell movement phenotype during zebrafish gastrulation.** (A-V) Embryos were injected with 8 ng control MO or 8 ng *apoa2* MO1 at 1-cell stage and processed for *in situ* hybridization for DV marker genes at shield stage or endoderm, mesoderm and neurectoderm marker genes at tail-bud stage in the morphants. (A-F) *hgg1* was used to indicate the prechordal plate, *ntl* for the prospective notochord, and *dlx3* for the anterior edge of the neural plate. (G-J) *myoD* and *papc* indicated the paraxial and lateral mesoderm. (K-L) *foxD3* was early neural crest specification marker. (M-N) *sox17* expressed in the endoderm progenitors. *Flh* and *gsc* were used as dorsal markers, and *gata2* and *eve1* as ventral markers. (A-B and G-R) show dorsal views, (C-D and U-V) show animal pole views and (E-F and S-T) show lateral views.

**Supplementary Fig 3. Co-injection with *apoa2* MO1 and MO2 at 1-cell or 1k-cell induces disorganization of YSN within the marginal ring and eYSN.** The YSN at the blastoderm margin (labeled with SYTOX Green) appeared incomplete division and accumulation (highlighted by white arrowheads) in embryos co-injected with MOs at either 1-cell or 1k-cell (A-E'). The eYSN (marker with DAPI) also displayed similar phenotypes (indicated with white arrowheads) with block *apoa2* at 1-cell or 1k-cell (F-K'). A'-K' denoted magnified views of the regions marked by rectangles in panel A-K.

**Supplementary Fig 4. The summary of incomplete nuclear division in the YSL at bud stage.** The embryos were pre-injection with control MO or *apoa2* MO1 at 1-cell stage. The ratio of incomplete division was 5.06% in wild-type embryos (n=6) and 17.71% in *apoa2* MO1 embryos (n=9).

**Supplementary Fig 5. *Apoa2* protein affects human HeLa cell proliferation.** (A): Representative images are shown the mitotic activity after treatment with serum, HDL, apoA-II and Lipids. (B): Quantification of the mitotic activity after treatment with serum, HDL, apoA-II and lipids is shown. (C): The represent images are shown the mitotic activity after overexpressing GFP and GFP fused *apoa2* C-terminal mutant MC46 in HeLa cells.

**Supplementary Fig 6.** ApoA-II protein or its mutant did not affect the formation of spindle or centrosome. Overexpression of full-length *apoa2*-GFP and mutation MC46-GFP in HeLa cells, alpha-tubulin antibody labelled spindle fiber and gamma-tubulin antibody labelled centrosome. Scale bar=20  $\mu$ m.

Supplemental figure 1

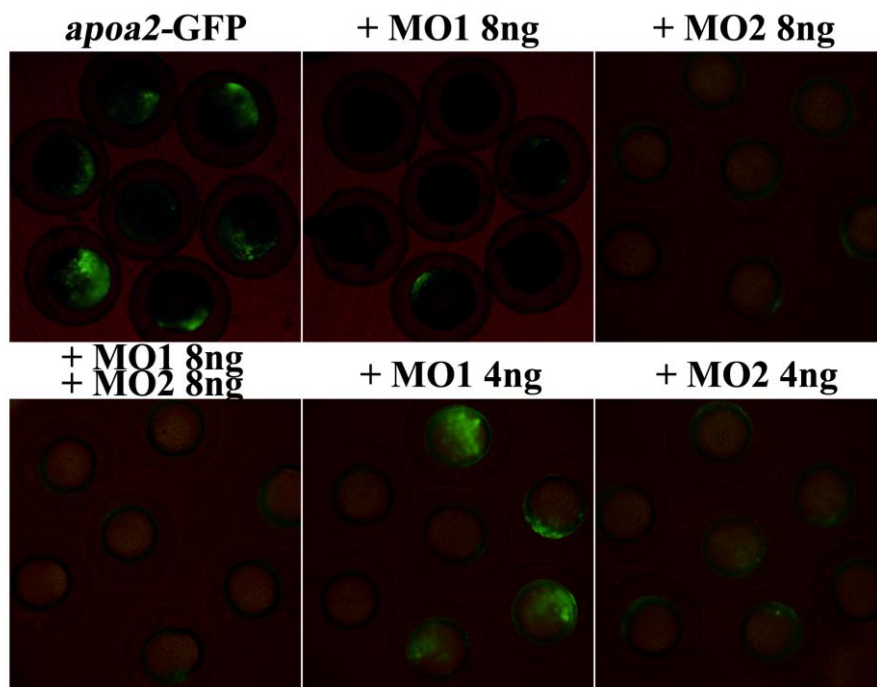

Supplemental figure 2

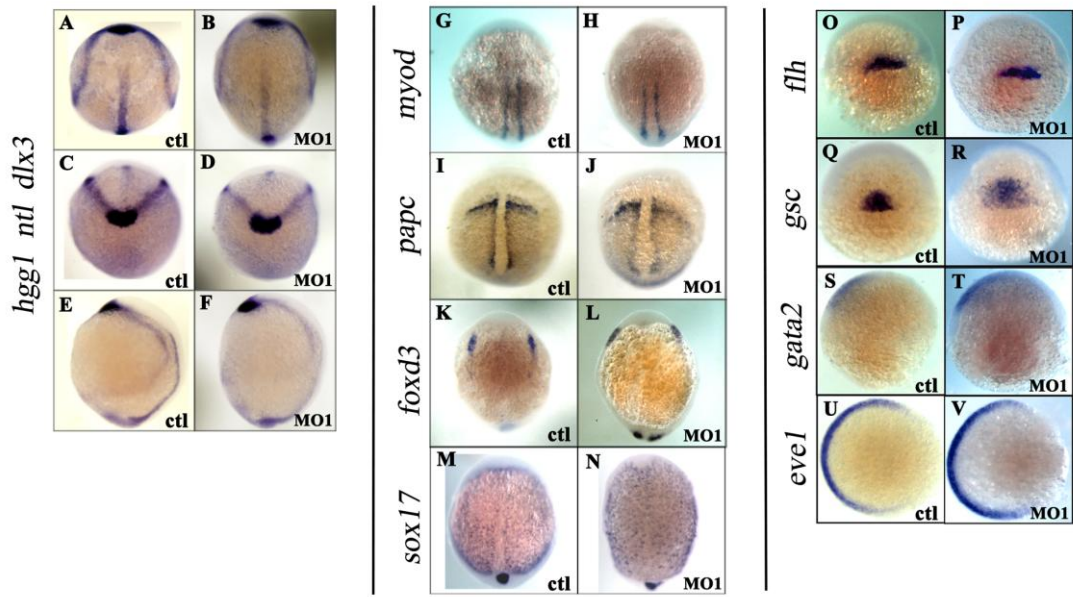

Supplemental figure 3

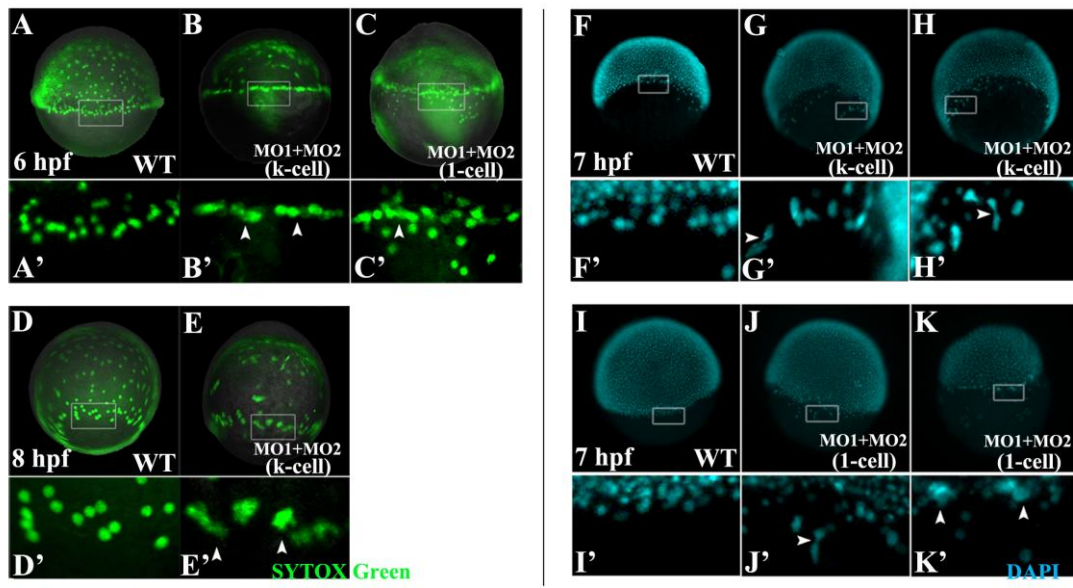

Supplemental figure 4

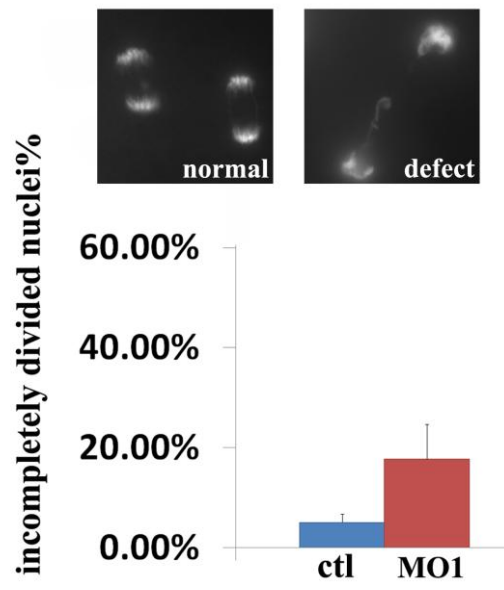

Supplemental figure 5

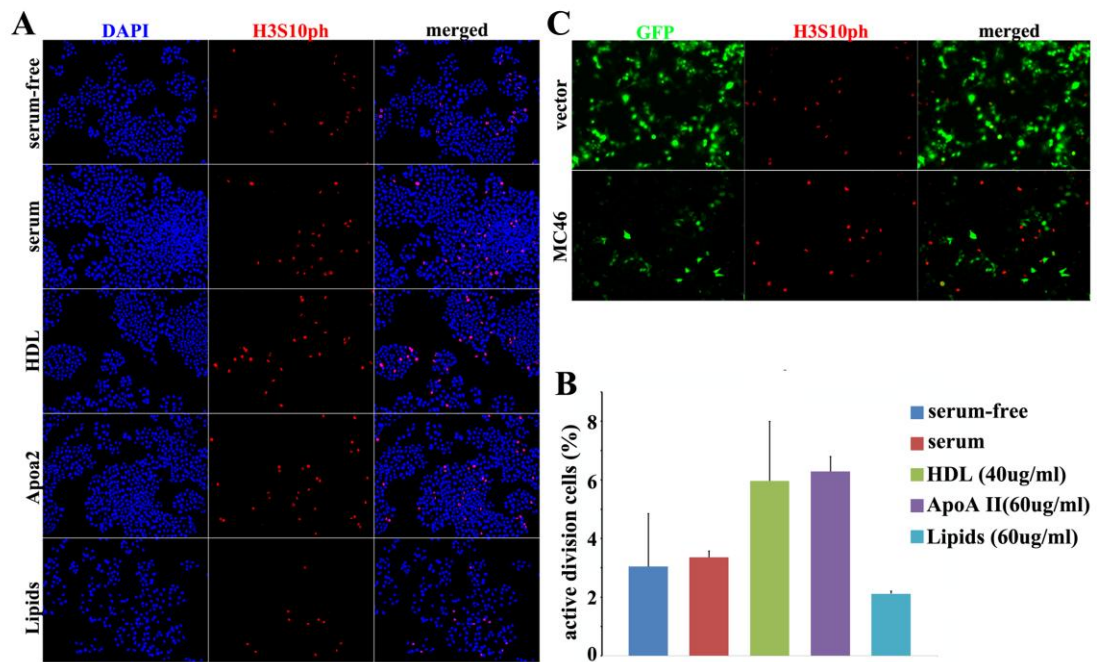

Supplemental figure 6

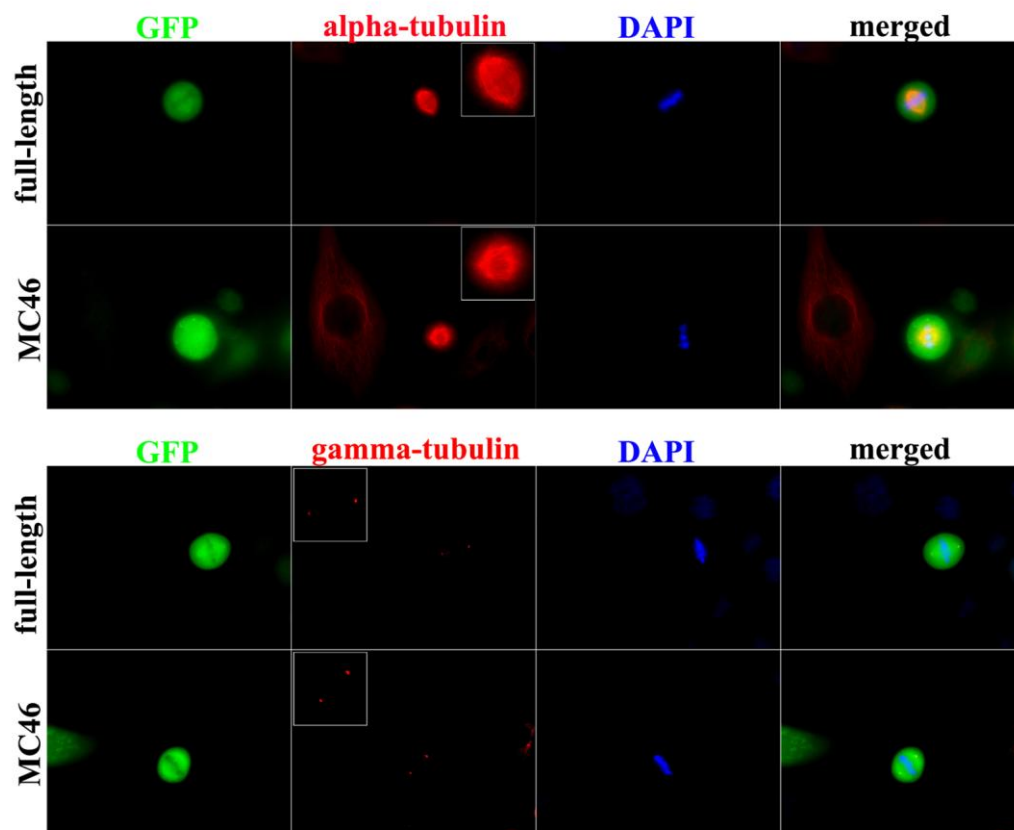

Supplement: supp_M110.134908_jbc.M110.134908-1.pdf [file supp_M110.134908_jbc.M110.134908-1.pdf]
